# Supplementary material
Source: MDPI journal article supplement (https://www.mdpi.com/2073-4441/15/17/3067)
Supplement: s1 [file s1]

## SUPPLEMENTARY MATERIAL

**Table S1 Pump model Database**

The database encompasses the following parameters characterizing the performance curves of each pump model:

- $\eta_0$ : Maximum efficiency of the pump model.
- $H_1$ ,  $A$ ,  $B$ : Coefficients pertaining to the head curve of each pump model.
- $Q_{b,max}$ : Upper limit of the pump model's flow capacity.
- $Q_0$ : Standard flow rate associated with each pump model in the best efficient point.
- $H_0$ : Standard head value for each pump model in the best efficient point.
- $E$ ,  $F$ : Coefficients related to the efficiency curve of each pump model.
- Cost: This cost includes both the pump's purchase price and installation expenses.

| N° Model | $\eta_0$ | $H_1$ (m) | $A$  | $B$ | $Q_{b,max}$ | $Q_0$ (L/s) | $H_0$ (m) | $E$    | $F$    | Cost (€) |
|----------|----------|-----------|------|-----|-------------|-------------|-----------|--------|--------|----------|
| 1        | 56.00%   | 26.17     | 0.24 | 2   | 10.52       | 5.26        | 19.63     | 0.2128 | 0.0202 | 2361.83  |
| 2        | 47.00%   | 22.83     | 0.28 | 2   | 9.02        | 4.51        | 17.12     | 0.2084 | 0.0231 | 2442.90  |
| 3        | 50.00%   | 27.75     | 0.28 | 2   | 10.00       | 5.00        | 20.81     | 0.2000 | 0.0200 | 2534.86  |
| 4        | 56.00%   | 37.00     | 0.27 | 2   | 11.72       | 5.86        | 27.75     | 0.1912 | 0.0163 | 2644.97  |
| 5        | 58.00%   | 42.53     | 0.27 | 2   | 12.54       | 6.27        | 31.89     | 0.1851 | 0.0148 | 2742.98  |
| 6        | 50.00%   | 48.30     | 0.37 | 2   | 11.44       | 5.72        | 36.23     | 0.1748 | 0.0153 | 3154.38  |
| 7        | 53.00%   | 55.85     | 0.27 | 2   | 14.41       | 7.20        | 41.89     | 0.1472 | 0.0102 | 3468.98  |
| 8        | 54.00%   | 68.65     | 0.29 | 2   | 15.51       | 7.75        | 51.49     | 0.1393 | 0.0090 | 3703.72  |
| 9        | 39.00%   | 69.79     | 0.20 | 2   | 18.73       | 9.36        | 52.34     | 0.0833 | 0.0044 | 5450.96  |
| 10       | 43.00%   | 92.35     | 0.25 | 2   | 19.29       | 9.65        | 69.26     | 0.0891 | 0.0046 | 5862.36  |
| 11       | 45.00%   | 102.75    | 0.23 | 2   | 21.18       | 10.59       | 77.06     | 0.0850 | 0.0040 | 6202.37  |
| 12       | 78.00%   | 26.92     | 0.04 | 2   | 25.14       | 12.57       | 20.19     | 0.1241 | 0.0049 | 2896.65  |
| 13       | 52.50%   | 27.99     | 0.10 | 2   | 17.04       | 8.52        | 20.99     | 0.1232 | 0.0072 | 2884.55  |
| 14       | 62.50%   | 33.86     | 0.08 | 2   | 21.17       | 10.58       | 25.39     | 0.1181 | 0.0056 | 3005.55  |
| 15       | 66.20%   | 42.59     | 0.07 | 2   | 24.68       | 12.34       | 31.94     | 0.1073 | 0.0043 | 3496.81  |
| 16       | 56.00%   | 41.33     | 0.17 | 2   | 15.59       | 7.79        | 31.00     | 0.1437 | 0.0092 | 3718.24  |
| 17       | 59.00%   | 56.51     | 0.12 | 2   | 21.37       | 10.68       | 42.39     | 0.1104 | 0.0052 | 3965.08  |
| 18       | 61.00%   | 67.73     | 0.11 | 2   | 24.27       | 12.14       | 50.80     | 0.1005 | 0.0041 | 4988.74  |
| 19       | 49.00%   | 59.30     | 0.11 | 2   | 23.49       | 11.74       | 44.48     | 0.0834 | 0.0036 | 5544.13  |
| 20       | 53.00%   | 75.21     | 0.12 | 2   | 25.40       | 12.70       | 56.41     | 0.0835 | 0.0033 | 5954.32  |
| 21       | 55.00%   | 100.47    | 0.11 | 2   | 30.18       | 15.09       | 75.35     | 0.0729 | 0.0024 | 7042.11  |
| 22       | 73.00%   | 15.77     | 0.02 | 2   | 29.86       | 14.93       | 11.83     | 0.0978 | 0.0033 | 2598.99  |
| 23       | 74.00%   | 19.13     | 0.02 | 2   | 33.03       | 16.52       | 14.35     | 0.0896 | 0.0027 | 2819.21  |
| 24       | 75.50%   | 23.49     | 0.01 | 2   | 42.86       | 21.43       | 17.61     | 0.0705 | 0.0016 | 2952.31  |
| 25       | 76.00%   | 27.26     | 0.01 | 2   | 43.87       | 21.94       | 20.45     | 0.0693 | 0.0016 | 3539.16  |
| 26       | 74.00%   | 29.42     | 0.02 | 2   | 37.55       | 18.77       | 22.06     | 0.0788 | 0.0021 | 3831.98  |
| 27       | 76.00%   | 38.08     | 0.02 | 2   | 42.64       | 21.32       | 28.56     | 0.0713 | 0.0017 | 4152.63  |
| 28       | 76.50%   | 43.63     | 0.02 | 2   | 48.50       | 24.25       | 32.72     | 0.0631 | 0.0013 | 4882.26  |
| 29       | 68.00%   | 55.49     | 0.05 | 2   | 34.78       | 17.39       | 41.61     | 0.0782 | 0.0022 | 5050.45  |
| 30       | 69.50%   | 63.54     | 0.04 | 2   | 38.94       | 19.47       | 47.65     | 0.0714 | 0.0018 | 5459.43  |
| 31       | 70.00%   | 67.24     | 0.04 | 2   | 38.70       | 19.35       | 50.43     | 0.0723 | 0.0019 | 5805.49  |

| N° Model | $\eta_0$ | H <sub>1</sub> (m) | A    | B | Q <sub>b,max</sub> | Q <sub>0</sub> (L/s) | H <sub>0</sub> (m) | E      | F      | Cost (€) |
|----------|----------|--------------------|------|---|--------------------|----------------------|--------------------|--------|--------|----------|
| 32       | 61.00%   | 81.41              | 0.04 | 2 | 45.42              | 22.71                | 61.06              | 0.0537 | 0.0012 | 7056.63  |
| 33       | 63.00%   | 104.98             | 0.04 | 2 | 48.63              | 24.32                | 78.73              | 0.0518 | 0.0011 | 9356.84  |
| 34       | 70.00%   | 20.50              | 0.23 | 2 | 9.42               | 4.71                 | 15.38              | 0.2973 | 0.0316 | 3637.17  |
| 35       | 73.00%   | 22.83              | 0.20 | 2 | 10.59              | 5.30                 | 17.13              | 0.2756 | 0.0260 | 3917.89  |
| 36       | 76.00%   | 26.81              | 0.19 | 2 | 11.99              | 5.99                 | 20.11              | 0.2536 | 0.0212 | 4884.68  |
| 37       | 76.00%   | 33.36              | 0.26 | 2 | 11.32              | 5.66                 | 25.02              | 0.2687 | 0.0237 | 4997.21  |
| 38       | 81.00%   | 44.44              | 0.26 | 2 | 12.99              | 6.50                 | 33.33              | 0.2494 | 0.0192 | 5407.40  |
| 39       | 72.00%   | 41.29              | 0.28 | 2 | 12.17              | 6.09                 | 30.97              | 0.2366 | 0.0194 | 5667.55  |
| 40       | 73.50%   | 49.14              | 0.24 | 2 | 14.27              | 7.14                 | 36.85              | 0.2060 | 0.0144 | 6009.98  |
| 41       | 75.00%   | 55.03              | 0.28 | 2 | 14.13              | 7.07                 | 41.27              | 0.2123 | 0.0150 | 7048.16  |
| 42       | 77.00%   | 68.92              | 0.27 | 2 | 15.97              | 7.99                 | 51.69              | 0.1928 | 0.0121 | 9053.13  |
| 43       | 73.00%   | 82.74              | 0.32 | 2 | 16.16              | 8.08                 | 62.06              | 0.1807 | 0.0112 | 9278.19  |
| 44       | 75.00%   | 93.45              | 0.31 | 2 | 17.41              | 8.71                 | 70.09              | 0.1723 | 0.0099 | 9552.86  |
| 45       | 77.00%   | 104.25             | 0.32 | 2 | 18.11              | 9.06                 | 78.19              | 0.1701 | 0.0094 | 11157.32 |
| 46       | 75.00%   | 26.58              | 0.10 | 2 | 16.61              | 8.31                 | 19.93              | 0.1806 | 0.0109 | 5225.90  |
| 47       | 78.00%   | 33.16              | 0.12 | 2 | 16.57              | 8.29                 | 24.87              | 0.1883 | 0.0114 | 5637.30  |
| 48       | 82.00%   | 34.83              | 0.08 | 2 | 20.48              | 10.24                | 26.12              | 0.1601 | 0.0078 | 5979.73  |
| 49       | 84.00%   | 39.62              | 0.08 | 2 | 21.96              | 10.98                | 29.71              | 0.1530 | 0.0070 | 6725.09  |
| 50       | 78.00%   | 49.06              | 0.14 | 2 | 18.79              | 9.40                 | 36.79              | 0.1660 | 0.0088 | 7230.87  |
| 51       | 79.00%   | 54.18              | 0.12 | 2 | 21.06              | 10.53                | 40.64              | 0.1501 | 0.0071 | 9297.55  |
| 52       | 80.00%   | 59.61              | 0.10 | 2 | 23.83              | 11.92                | 44.71              | 0.1343 | 0.0056 | 9655.71  |
| 53       | 80.50%   | 65.69              | 0.10 | 2 | 25.38              | 12.69                | 49.27              | 0.1269 | 0.0050 | 10845.14 |
| 54       | 82.00%   | 73.46              | 0.19 | 2 | 19.63              | 9.82                 | 55.09              | 0.1670 | 0.0085 | 11260.17 |
| 55       | 82.00%   | 86.11              | 0.14 | 2 | 24.78              | 12.39                | 64.58              | 0.1324 | 0.0053 | 13745.51 |
| 56       | 80.00%   | 100.97             | 0.14 | 2 | 26.83              | 13.41                | 75.73              | 0.1193 | 0.0044 | 16492.21 |
| 57       | 78.00%   | 41.57              | 0.07 | 2 | 23.57              | 11.78                | 31.18              | 0.1324 | 0.0056 | 7627.75  |
| 58       | 80.50%   | 48.18              | 0.06 | 2 | 28.01              | 14.00                | 36.14              | 0.1150 | 0.0041 | 9405.24  |
| 59       | 81.50%   | 53.70              | 0.06 | 2 | 29.91              | 14.96                | 40.28              | 0.1090 | 0.0036 | 9758.56  |
| 60       | 82.50%   | 59.98              | 0.05 | 2 | 33.28              | 16.64                | 44.99              | 0.0992 | 0.0030 | 11108.92 |
| 61       | 83.00%   | 65.09              | 0.04 | 2 | 38.31              | 19.16                | 48.81              | 0.0867 | 0.0023 | 13597.89 |
| 62       | 82.50%   | 62.74              | 0.10 | 2 | 25.05              | 12.53                | 47.06              | 0.1317 | 0.0053 | 11365.44 |
| 63       | 82.75%   | 71.69              | 0.08 | 2 | 29.72              | 14.86                | 53.77              | 0.1114 | 0.0037 | 14119.40 |
| 64       | 83.00%   | 82.03              | 0.07 | 2 | 33.94              | 16.97                | 61.52              | 0.0978 | 0.0029 | 16866.10 |
| 65       | 70.00%   | 44.54              | 0.02 | 2 | 50.74              | 25.37                | 33.41              | 0.0552 | 0.0011 | 11490.07 |
| 66       | 72.00%   | 49.37              | 0.02 | 2 | 50.45              | 25.23                | 37.03              | 0.0571 | 0.0011 | 13486.57 |
| 67       | 74.00%   | 54.58              | 0.02 | 2 | 48.27              | 24.13                | 40.93              | 0.0613 | 0.0013 | 17258.14 |
